# Supplementary material for: Fish-Derived Protein Hydrolysates Increase Insulin Sensitivity and Alter Intestinal Microbiome in High-Fat-Induced Obese Mice
Source: MDPI journal article supplement (doi:10.3390/md21060343), 2023-06-02
Supplement: s1 [file s1]

Supplementary Material for

# Fish-derived protein hydrolysates increase insulin sensitivity and alter intestinal microbiome in high-fat induced obese mice

Maria G. Daskalaki <sup>1,2,†</sup>, Konstantinos Axarlis <sup>1,2,†</sup>, Antiopi Tsourekis <sup>3</sup>, Sofia Michailidou <sup>3</sup>, Christina Efraimoglou <sup>1,2</sup>, Ioanna Lapi <sup>1,2</sup>, Ourania Kolliniati <sup>1,2</sup>, Eirini Dermizaki <sup>1,2</sup>, Maria Venihaki <sup>1</sup>, Katerina Kousoulaki <sup>4</sup>, Anagnostis Argiriou <sup>3,5</sup> and Christos Tsatsanis <sup>1,2,\*</sup>

<sup>1</sup> Laboratory of Clinical Chemistry, Medical School, University of Crete, Heraklion 70013, Greece; konax@outlook.com (KA); m.daskalaki@med.uoc.gr (MGD); christinaefr96@gmail.com (CE); raliakolliniatis21@gmail.com (OK); iwanna\_lapi@hotmail.com (IL); tsatsani@uoc.gr (C.T.)

<sup>2</sup> Institute of Molecular Biology and Biotechnology, FORTH, 71100 Heraklion, Greece

<sup>3</sup> Institute of Applied Biosciences (INAB), CERTH, Thessaloniki GR-57001, Greece; adatsourekis@certh.gr (AT), sofia\_micha28@certh.gr (SM), argiriou@certh.gr (AA)

<sup>4</sup> Department of Nutrition and Feed Technology, Nofima AS, 5141 Bergen, Norway; katerina.kousoulaki@Nofima.no (KK)

<sup>5</sup> Department of Food Science and Nutrition, University of the Aegean, Myrina, 81400, Lemnos, Greece;

<sup>†</sup> These authors contributed equally to this work.

\* Correspondence: tsatsani@uoc.gr, Tel.: +30-2810394833 (CT)

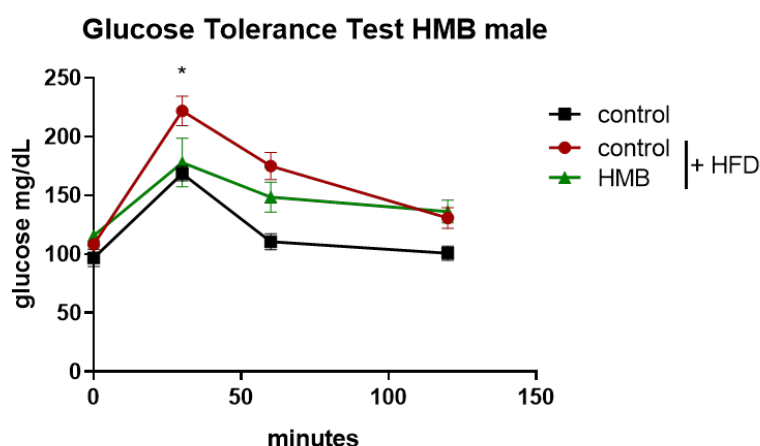

**Figure S1.** Monitoring the effect of HMB diet supplementation in male mice in high-fat diet induced insulin resistance. A-F. Black colour indicates the group of mice consuming the lean diet, red colour indicates the group of mice consuming the high-fat diet used as control. Graph represent mean  $\pm$  SEM. 2-way ANOVA test was performed. \*  $p < 0.05$ , \*\*  $p < 0.01$ , \*\*\*  $p < 0.001$

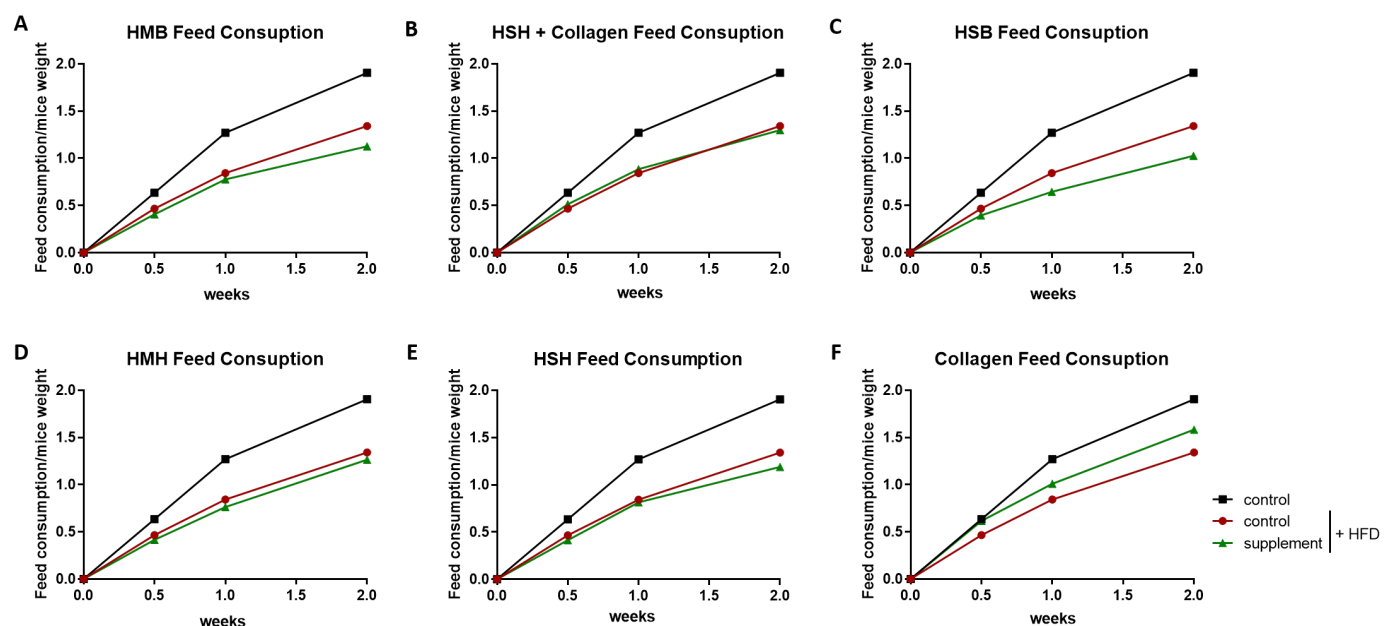

**Figure S2.** Measuring Feed consumption supplemented with the indicated protein hydrolysate in a 2-week period (A-F). Black colour indicates the group of mice consuming the lean diet, red colour indicates the group of mice consuming the high-fat diet used as control.

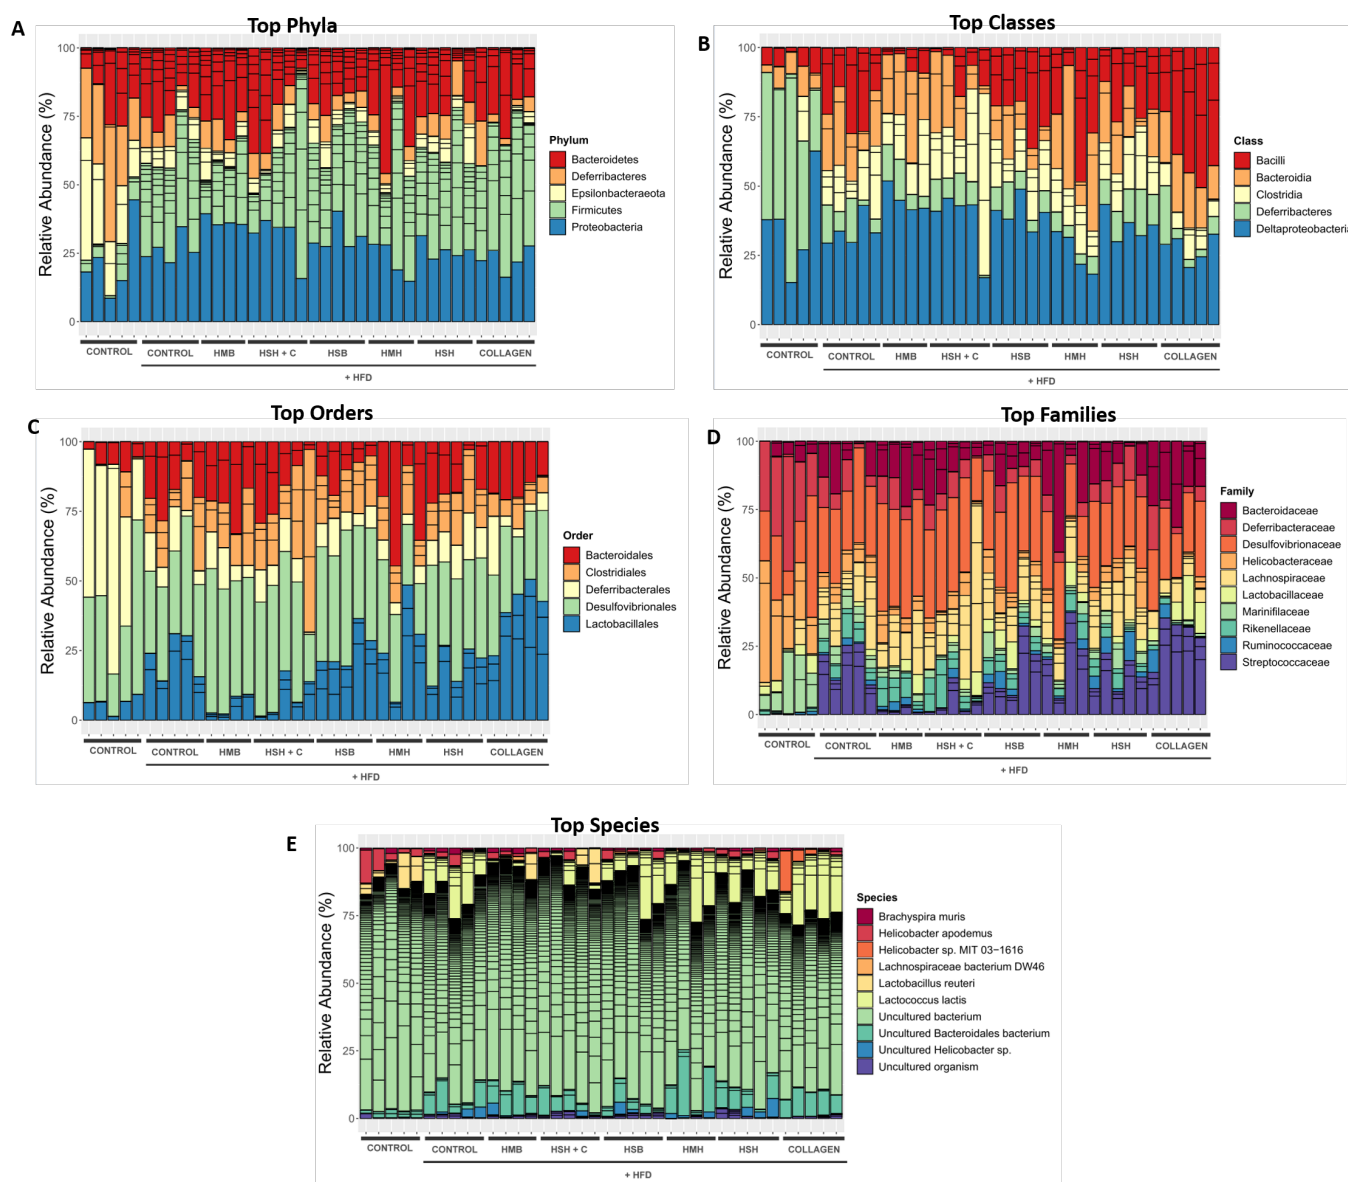

**Figure S3.** The effect of fish-derived protein hydrolysates on the intestinal microbiome composition of top A. phyla, B. classes, C. orders, D. families and E. species. Top genera are depicted in the main paper.
